# Supplementary material
Source: PubMed Central journal article supplement (PMC7869870)
Supplement: Supp_Data.pdf [file Supp_Data.pdf]

**|Supplemental Material**

**Assessing Patterns of Palliative Care Referral and Location of Death in Patients with Idiopathic Pulmonary Fibrosis: A 16-Year Single-Center Retrospective Cohort Study**

Richard H. Zou, MD, Mehdi Nouraie, MD, PhD, Xiaoping Chen, MS, Melissa I. Saul, MS,  
Naftali Kaminski, MD, Kevin F. Gibson, MD, Daniel J. Kass, MD,  
Kathleen O. Lindell, PhD, RN

|                                   | All       | No PC |           | PC |          | P Value |
|-----------------------------------|-----------|-------|-----------|----|----------|---------|
|                                   | Results   | n     | Results   | n  | Results  |         |
| <b>Death (n, %)</b>               | 559 (86%) | 574   | 489 (85%) | 74 | 70 (95%) | 0.027   |
| <b>Death:</b>                     |           | 315   |           | 61 |          | 0.009   |
| <b>Hospital (n, %)</b>            | 211 (56%) |       | 186 (59%) |    | 25 (41%) |         |
| <b>Home or Hospice (n, %)</b>     | 165 (44%) |       | 129 (41%) |    | 36 (59%) |         |
| <b>Death: Academic ICU (n, %)</b> | 107 (51%) | 186   | 94 (51%)  | 25 | 13 (52%) | 0.89    |

**s-Table 1. Location of Death (2000 to 2012).** PC referral recipients had less in-hospital death. Values are documented as median or percentages (IQR), except when marked \*, indicating mean (SD). PC=palliative care. ICU=intensive care unit.

|                                   | All      | No PC |          | PC |          | P Value |
|-----------------------------------|----------|-------|----------|----|----------|---------|
|                                   | Results  | n     | Results  | n  | Results  |         |
| <b>Death (n, %)</b>               | 77 (43%) | 142   | 47 (33%) | 38 | 30 (79%) | <0.001  |
| <b>Death:</b>                     |          | 32    |          | 24 |          | 0.16    |
| <b>Hospital (n, %)</b>            | 34 (61%) |       | 22 (69%) |    | 12 (50%) |         |
| <b>Home or Hospice (n, %)</b>     | 22 (39%) |       | 10 (31%) |    | 12 (50%) |         |
| <b>Death: Academic ICU (n, %)</b> | 18 (56%) | 21    | 13 (62%) | 11 | 5 (45%)  | 0.37    |

**s-Table 2. Location of Death (2013 to 2016).** PC referral recipients had lower percentage of in-hospital death. Values are documented as median or percentages (IQR), except when marked \*, indicating mean (SD). PC=palliative care. ICU=intensive care unit.

|                                       | All             | No PC |                 | PC |                 | P Value |
|---------------------------------------|-----------------|-------|-----------------|----|-----------------|---------|
|                                       | Results         | n     | Results         | n  | Results         |         |
| Age at Diagnosis (years)              | 69 (63-75)      | 566   | 69 (63-75)      | 74 | 71 (65-76)      | 0.069   |
| Age at Death (years)                  | 74 (67-79)      | 489   | 73 (67-79)      | 70 | 76 (69-81)      | 0.015   |
| Male (n, %)                           | 397 (61%)       | 574   | 353 (62%)       | 74 | 44 (59%)        | 0.74    |
| White Non-Hispanic (n, %)             | 631 (97%)       | 574   | 559 (97%)       | 74 | 72 (97%)        | 0.96    |
| Smoker (n, %)                         | 437 (68%)       | 572   | 392 (69%)       | 72 | 45 (63%)        | 0.36    |
| Tobacco (pack years)*                 | 23.8 (26.9)     | 538   | 23.2 (25.6)     | 71 | 28.4 (34.6)     | 0.22    |
| Initial Oxygen Requirement (L)*       | 1.12 (1.84)     | 568   | 1.13 (1.84)     | 73 | 1.07 (1.89)     | 0.79    |
| Initial Oxygen Requirement >0L (n, %) | 212 (33%)       | 568   | 190 (34%)       | 73 | 22 (30%)        | 0.57    |
| Diagnosis to Initial Visit (days)     | 285 (0-650)     | 566   | 289 (2-679)     | 74 | 228 (0-453)     | <0.001  |
| Diagnosis to Death (days)             | 1281 (668-2067) | 488   | 1257 (659-2007) | 70 | 1539 (805-2339) | 0.13    |
| Distance from Center (miles)          | 52 (16-112)     | 572   | 59 (20-120)     | 73 | 15 (10-33)      | <0.001  |
| Number of Center Visits               | 4 (2-8)         | 574   | 3 (2-8)         | 73 | 7 (3-15)        | <0.001  |
| Support Group (n, %)                  | 162 (25%)       | 574   | 125 (22%)       | 74 | 37 (50%)        | <0.001  |
| Charlson Index*                       | 0.73 (1.02)     | 574   | 0.71 (1.01)     | 74 | 0.82 (1.06)     | 0.40    |
| Charlson Index $\geq 1$ , (n, %)      | 282 (44%)       | 574   | 243 (42%)       | 74 | 39 (53%)        | 0.090   |

**s-Table 3. Baseline Patient Demographics (2000 to 2012).** PC referral recipients resided closer to the outpatient center and had more follow-up visits. Values are documented as median or percentages (IQR), except when marked \*, indicating mean (SD). PC=palliative care.

|                                   | All        | No PC |            | PC |            | P Value |
|-----------------------------------|------------|-------|------------|----|------------|---------|
|                                   | Results    | n     | Results    | n  | Results    |         |
| Initial FVC %                     | 64 (51-77) | 539   | 63 (50-76) | 71 | 65 (55-78) | 0.17    |
| Initial DLco %                    | 42 (31-57) | 472   | 42 (30-56) | 60 | 49 (35-58) | 0.10    |
| Last FVC %                        | 58 (45-72) | 341   | 58 (45-72) | 61 | 59 (45-71) | 0.49    |
| Last DLco %                       | 37 (27-54) | 253   | 37 (28-55) | 51 | 34 (24-50) | 0.13    |
| Initial GAP Index*                | 4.2 (1.5)  | 470   | 4.2 (1.5)  | 60 | 3.8 (1.3)  | 0.07    |
| Initial GAP Stage $\geq 2$ (n, %) | 370 (69%)  | 470   | 337 (72%)  | 60 | 33 (55%)   | 0.008   |

**s-Table 4. Pulmonary Characteristics (2000 to 2012).** There were no differences in initial pulmonary function. Values are documented as median or percentages (IQR), except when marked \*, indicating mean (SD). PC=palliative care. FVC=forced vital capacity. DLco=diffusing capacity of lungs for carbon monoxide. GAP=Gender, Age, and Physiology.

|                                                  | All              | No PC |                  | PC |                   | P Value |
|--------------------------------------------------|------------------|-------|------------------|----|-------------------|---------|
|                                                  | Results          | n     | Results          | n  | Results           |         |
| <b>Age at Diagnosis (years)</b>                  | 71 (65-77)       | 141   | 70 (64-76)       | 38 | 74 (68-80)        | 0.004   |
| <b>Age at Death (years)</b>                      | 73 (67-79)       | 47    | 73 (65-79)       | 30 | 75 (68-82)        | 0.24    |
| <b>Male (n, %)</b>                               | 126 (70%)        | 142   | 105 (74%)        | 38 | 21 (55%)          | 0.026   |
| <b>White Non-Hispanic (n, %)</b>                 | 156 (95%)        | 128   | 123 (96%)        | 37 | 33 (89%)          | 0.10    |
| <b>Smoker (n, %)</b>                             | 122 (68%)        | 142   | 99 (70%)         | 38 | 23 (61%)          | 0.10    |
| <b>Tobacco (pack years)*</b>                     | 21.7 (29.0)      | 135   | 21.6 (26.5)      | 37 | 21.9 (37.1)       | 0.97    |
| <b>Initial Oxygen Requirement (L)*</b>           | 1.0 (1.8)        | 142   | 0.9 (1.7)        | 38 | 1.4 (1.8)         | 0.11    |
| <b>Initial Oxygen Requirement &gt;0L (n, %)</b>  | 55 (31%)         | 142   | 38 (27%)         | 38 | 17 (45%)          | 0.033   |
| <b>Diagnosis to Initial Visit (days)</b>         | 0 (0-133)        | 142   | 0 (0-103)        | 38 | 0 (0-536)         | 0.64    |
| <b>Diagnosis to Death (days)</b>                 | 541<br>(276-992) | 47    | 520<br>(198-928) | 30 | 650<br>(290-1171) | 0.82    |
| <b>Distance from Center (miles)</b>              | 37 (12-86)       | 142   | 39 (13-86)       | 38 | 23 (12-81)        | 0.15    |
| <b>Number of Center Visits</b>                   | 6 (3-9)          | 142   | 5 (3-9)          | 38 | 8 (5-10)          | 0.13    |
| <b>Support Group (n, %)</b>                      | 16 (9%)          | 142   | 14 (10%)         | 38 | 2 (5%)            | 0.38    |
| <b>Charlson Index*</b>                           | 0.89 (1.24)      | 142   | 0.82 (1.22)      | 38 | 1.18 (1.31)       | 0.13    |
| <b>Charlson Index <math>\geq</math>1, (n, %)</b> | 84 (47%)         | 142   | 61 (43%)         | 38 | 23 (61%)          | 0.054   |

**s-Table 5. Baseline Patient Demographics (2013 to 2016).** PC referral recipients were older. Values are documented as median or percentages (IQR), except when marked \*, indicating mean (SD). PC=palliative care.

|                                                    | All        | No PC |            | PC |            | P Value |
|----------------------------------------------------|------------|-------|------------|----|------------|---------|
|                                                    | Results    | n     | Results    | n  | Results    |         |
| <b>Initial FVC %</b>                               | 67 (53-80) | 137   | 69 (58-81) | 38 | 54 (50-67) | <0.001  |
| <b>Initial DLco %</b>                              | 48 (35-66) | 124   | 50 (38-67) | 34 | 38 (28-58) | 0.002   |
| <b>Last FVC %</b>                                  | 64 (48-76) | 97    | 67 (54-77) | 30 | 49 (36-65) | 0.035   |
| <b>Last DLco %</b>                                 | 43 (31-57) | 85    | 45 (32-58) | 19 | 38 (30-50) | 0.11    |
| <b>Initial GAP Index*</b>                          | 3.9 (1.5)  | 124   | 3.8 (1.5)  | 34 | 4.4 (1.3)  | 0.010   |
| <b>Initial GAP Stage <math>\geq</math>2 (n, %)</b> | 91 (58%)   | 124   | 65 (52%)   | 34 | 26 (76%)   | 0.012   |

**s-Table 6. Pulmonary Characteristics (2013 to 2016).** PC referral recipients had worse initial pulmonary function. Values are documented as median or percentages (IQR), except when marked \*, indicating mean (SD). PC=palliative care. FVC=forced vital capacity. DLco=diffusing capacity of lungs for carbon monoxide. GAP=Gender, Age, and Physiology.

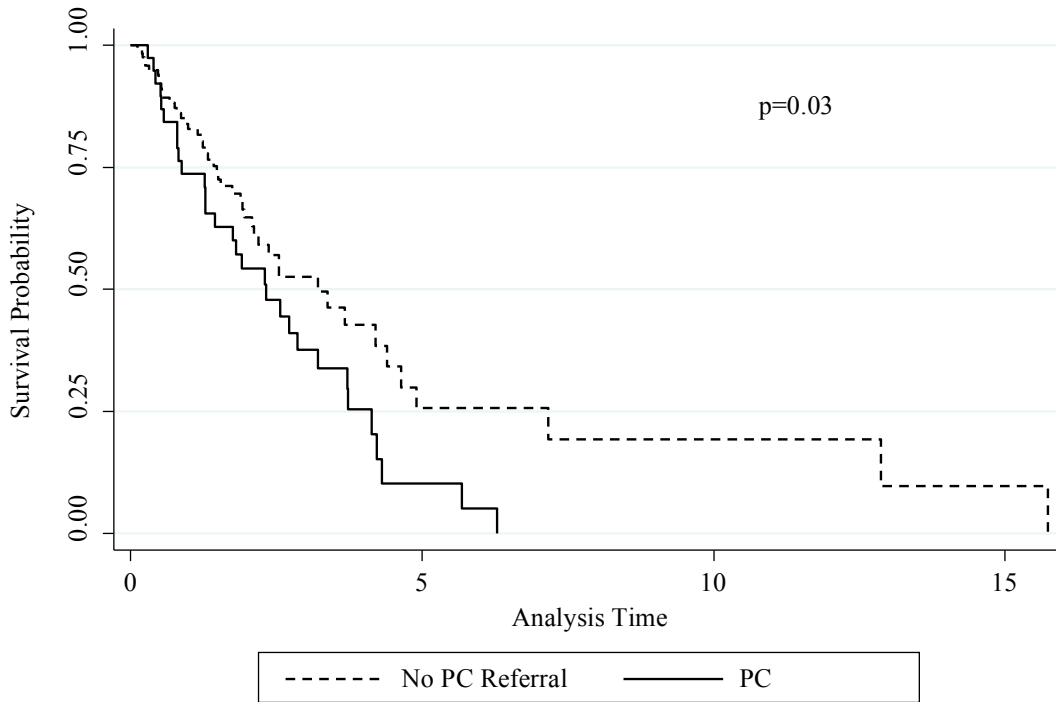

**s-Figure 1. Kaplan-Meier Survival Curve (2013 to 2016).** Mortality estimates for patients who received PC (solid) compared with those who did not receive PC (dashed). PC referral recipients had lower survival ( $p=0.034$ ). PC=palliative care.

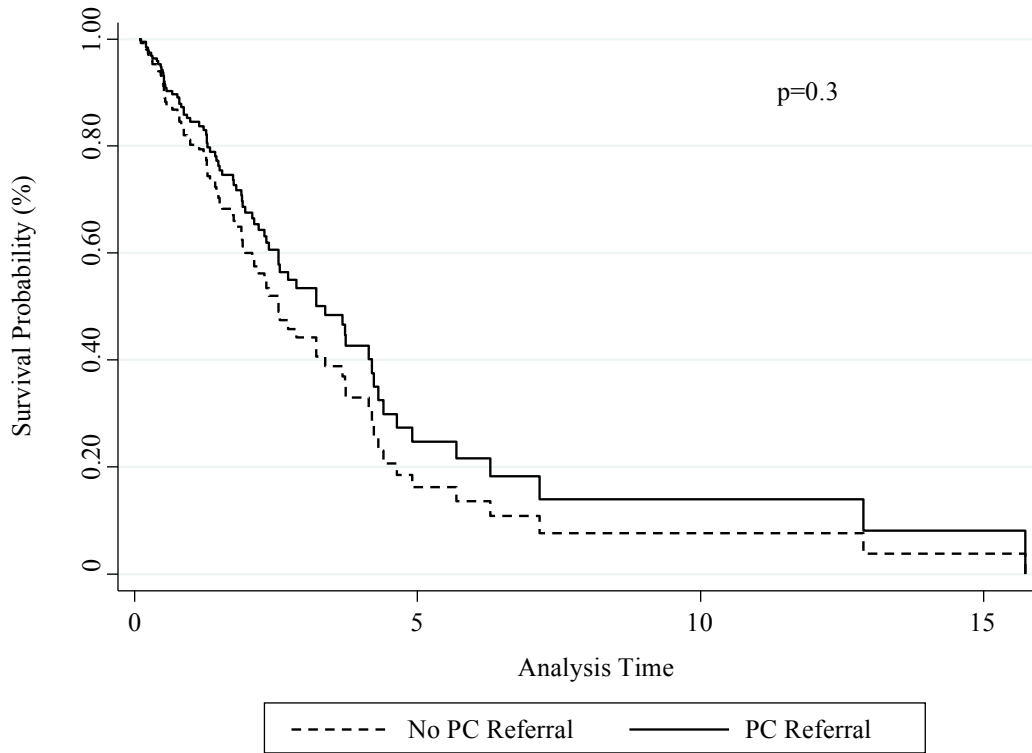

**s-Figure 2. Kaplan-Meier Survival Curve (2013 to 2016).** Mortality estimates for patients who received PC (red) compared to those who did not receive PC (blue), adjusted by baseline FVC% and initial oxygen requirement by adjusted Cox model. There were no survival differences between groups. PC=palliative care.
